# Supplementary material
Source: PubMed Central journal article supplement (PMC4378506)
Supplement: cr500452k_si_001.pdf [file cr500452k_si_001.pdf]

**Supporting Table 1.** 98 protein acetylation substrates of p300/CBP

- ACTR      Chen H, Lin RJ, Xie W, Wilpitz D, Evans RM. *Cell* 1999, 98:675-686.
- AR      Fu M, Wang C, Reutens AT, Wang J, Angeletti RH, Siconolfi-Baez L, Ogryzko V, Avantaggiati ML, Pestell RG. *J Biol Chem* 2000, 275:20853-20860.
- ATF-2      Karanam B, Wang L, Wang D, Liu X, Marmorstein R, Cotter R, Cole PA. *Biochemistry* 2007, 46:8207-8216.
- ATF5      Liu DX, Qian D, Wang B, Yang JM, Lu Z. *Mol Cell Biol* 2011, 31:3906-3916.
- ATF4      Lassot I, Estrabaud E, Emiliani S, Benkirane M, Benarous R, Margottin-Goguet F. *J Biol Chem* 2005, 280:41537-41545.
- BETA2      Qiu Y, Guo M, Huang S, Stein R. *J Biol Chem* 2004, 279:9796-9802.
- BTF3      Yang YY, Grammel M, Hang HC. *Bioorg Med Chem Lett*. 2011, 22:4976-9.
- c-Abl      di Bari MG, Ciuffini L, Mingardi M, Testi R, Soddu S, Barila D. *EMBO Rep* 2006, 7:727-733.
- CDK9      Fu J, Yoon HG, Qin J, Wong J. *Mol Cell Biol* 2007, 27:4641-4651.
- C/EBP $\beta$       Cesena TI, Cardinaux JR, Kwok R, Schwartz J. *J Biol Chem* 2007, 282:956-967; Xu M, Nie L, Kim SH, Sun XH. *Embo J* 2003, 22:893-904.

CXCL9 Yang YY, Grammel M, Hang HC. *Bioorg Med Chem Lett.* 2011, 1;21(17):4976-9.

c-Myb Tomita A, Towatari M, Tsuzuki S, Hayakawa F, Kosugi H, Tamai K, Miyazaki T, Kinoshita T, Saito H. *Oncogene* 2000, 19:444-451; Sano Y, Ishii S. *J Biol Chem* 2001, 276:3674-3682.

c-Myc Zhang K, Faiola F, Martinez E. *Biochem Biophys Res Commun* 2005, 336:274-280.

CtBP2 Zhao LJ, Subramanian T, Zhou Y, Chinnadurai G. *J Biol Chem* 2006, 281:4183-4189.

DYHC1 Yang YY, Grammel M, Hang HC. *Bioorg Med Chem Lett.* 2011, 1;21(17):4976-9.

E1A Zhang Q, Yao H, Vo N, Goodman RH. *Proc Natl Acad Sci U S A* 2000, 97:14323-14328.

E2F1 Marzio G, Wagener C, Gutierrez MI, Cartwright P, Helin K, Giacca M. *J Biol Chem* 2000, 275:10887-10892; Martinez-Balbas MA, Bauer UM, Nielsen SJ, Brehm A, Kouzarides T. *Embo J* 2000, 19:662-671.

EF1A1 Yang YY, Grammel M, Hang HC. *Bioorg Med Chem Lett.* 2011, 1;21(17):4976-9.

EKLF Zhang W, Bieker JJ. *Proc Natl Acad Sci U S A* 1998, 95:9855-9860.

ER $\alpha$  Kim MY, Woo EM, Chong YT, Homenko DR, Kraus WL. *Mol Endocrinol* 2006, 20:1479-1493; Wang C, Fu M, Angeletti RH, Siconolfi-Baez L, Reutens AT, Albanese C, Lisanti MP, Katzenellenbogen BS, Kato S, Hopp T, *et al.* *J Biol Chem* 2001, 276:18375-18383.

Fen1 Hasan S, Stucki M, Hassa PO, Imhof R, Gehrig P, Hunziker P, Hubscher U, Hottiger MO. *Mol Cell* 2001, 7:1221-1231.

FoxO1 Daitoku H, Hatta M, Matsuzaki H, Aratani S, Ohshima T, Miyagishi M, Nakajima T, Fukamizu A. *Proc Natl Acad Sci U S A* 2004, 101:10042-10047.

GAPDH Sen N, Hara MR, Kornberg MD, Cascio MB, Bae BI, Shahani N, Thomas B, Dawson TM, Dawson VL, Snyder SH, *et al.* *Nat Cell Biol* 2008, 10:866-873.

GATA-1 Hung HL, Lau J, Kim AY, Weiss MJ, Blobel GA. *Mol Cell Biol* 1999, 19:3496-3505.

GATA-3 Yamagata T, Mitani K, Oda H, Suzuki T, Honda H, Asai T, Maki K, Nakamoto T, Hirai H. *Embo J* 2000, 19:4676-4687.

GATA-4 Kawamura T, Ono K, Morimoto T, Wada H, Hirai M, Hidaka K, Morisaki T, Heike T, Nakahata T, Kita T, *et al.* *J Biol Chem* 2005, 280:19682-19688.

GCMa Chang CW, Chuang HC, Yu C, Yao TP, Chen H. *Mol Cell Biol* 2005, 25:8401-8414.

HDAC1 Qiu Y, Zhao Y, Becker M, John S, Parekh BS, Huang S, Hendarwanto A, Martinez ED, Chen Y, Lu H, *et al.* *Mol Cell* 2006, 22:669-679.

HIC1 Stankovic-Valentin N, Deltour S, Seeler J, Pinte S, Vergoten G, Guerardel C, Dejean A, Leprince D. *Mol Cell Biol* 2007, 27:2661-2675.

Histone H2A Schiltz RL, Mizzen CA, Vassilev A, Cook RG, Allis CD, Nakatani Y. *J Biol Chem* 1999, 274:1189-1192.

Histone H2B Schiltz RL, Mizzen CA, Vassilev A, Cook RG, Allis CD, Nakatani Y. *J Biol Chem* 1999, 274:1189-1192.

Histone H3 Schiltz RL, Mizzen CA, Vassilev A, Cook RG, Allis CD, Nakatani Y. *J Biol Chem* 1999, 274:1189-1192.

Histone H4 Schiltz RL, Mizzen CA, Vassilev A, Cook RG, Allis CD, Nakatani Y. *J Biol Chem* 1999, 274:1189-1192.

HMG14 Bergel M, Herrera JE, Thatcher BJ, Prymakowska-Bosak M, Vassilev A, Nakatani Y, Martin B, Bustin M. *J Biol Chem* 2000, 275:11514-11520.

HMG1(Y) Munshi N, Merika M, Yie J, Senger K, Chen G, Thanos D. *Mol Cell* 1998, 2:457-467; Zhang Q, Zhang K, Zou Y, Perna A, Wang Y. *J Am Soc Mass Spectrom* 2007, 18:1569-1578.

HMG1L10 Yang YY, Grammel M, Hang HC. *Bioorg Med Chem Lett*. 2011, 1;21(17):4976-9.

HNF4 Soutoglou E, Katrakili N, Talianidis I. *Mol Cell* 2000, 5:745-751.

IFN $\alpha$ R2 Tang X, Gao JS, Guan YJ, McLane KE, Yuan ZL, Ramratnam B, Chin YE. *Cell* 2007, 131:93-105.

Importin- $\alpha$  Bannister AJ, Miska EA, Gorlich D, Kouzarides T. *Curr Biol* 2000, 10:467-470.

Integrase Topper M, Luo Y, Zhadina M, Mohammed K, Smith L, Muesing MA. *J Virol* 2007, 81:3012-3017.

KI-67 Yang YY, Grammel M, Hang HC. *Bioorg Med Chem Lett*. 2011, 1;21(17):4976-9.

KLF4 Evans PM, Zhang W, Chen X, Yang J, Bhakat KK, Liu C. *J Biol Chem* 2007, 282:33994-34002.

KLF6 Rowland BD, Peeper DS. *Nat Rev Cancer* 2006, 6:11-23.

Ku70 Cohen HY, Lavu S, Bitterman KJ, Hekking B, Imahiyerobo TA, Miller C, Frye R, Ploegh H, Kessler BM, Sinclair DA. *Mol Cell* 2004, 13:627-638.

L10a Yang YY, Grammel M, Hang HC. *Bioorg Med Chem Lett*. 2011, 1;21(17):4976-9.

LRP2 Yang YY, Grammel M, Hang HC. *Bioorg Med Chem Lett*. 2011, 1;21(17):4976-9.

MAML1 Saint Just Ribeiro M, Hansson ML, Wallberg AE. *Biochem J* 2007, 404:289-298.

Matrin-3 Yang YY, Grammel M, Hang HC. *Bioorg Med Chem Lett*. 2011, 1;21(17):4976-9.

MAX        Faiola F, Wu YT, Pan S, Zhang K, Farina A, Martinez E. *Biochem J* 2007, 403:397-407.

MEF2C      Angelelli C, Magli A, Ferrari D, Ganassi M, Matafora V, Parise F, Razzini G, Bachi A, Ferrari S, Molinari S. *Nucleic Acids Res* 2008, 36:915-928.

MKP-1      Cao W, Bao C, Padalko E, Lowenstein CJ. *J Exp Med* 2008, 205:1491-1503.

MyoD        Poleskaya A, Duquet A, Naguibneva I, Weise C, Vervisch A, Bengal E, Hucho F, Robin P, Harel-Bellan A. *J Biol Chem* 2000, 275:34359-34364.

NF-IL6 $\beta$     Wang JM, Ko CY, Chen LC, Wang WL, Chang WC. *Nucleic Acids Res* 2006, 34:217-231.

NF $\kappa$ B        Chen L, Fischle W, Verdin E, Greene WC. *Science* 2001, 293:1653-1657.

NF-YB        Li Q, Herrler M, Landsberger N, Kaludov N, Ogryzko VV, Nakatani Y, Wolffe AP. *Embo J* 1998, 17:6300-6315.

Nucleolin    Yang YY, Grammel M, Hang HC. *Bioorg Med Chem Lett.* 2011, 1;21(17):4976-9.

Nucleolin homolog FLJ45706    Yang YY, Grammel M, Hang HC. *Bioorg Med Chem Lett.* 2011, 1;21(17):4976-9.

Nucleophosmin-2    Yang YY, Grammel M, Hang HC. *Bioorg Med Chem Lett.* 2011, 1;21(17):4976-9.

OGG1 Bhakat KK, Mokkaapati SK, Boldogh I, Hazra TK, Mitra S. Mol Cell Biol 2006, 26:1654-1665.

p15 Yang YY, Grammel M, Hang HC. Bioorg Med Chem Lett. 2011, 1;21(17):4976-9.

p300/CBP Thompson PR, Wang D, Wang L, Fulco M, Pediconi N, Zhang D, An W, Ge Q, Roeder RG, Wong J, Levvero M, Sartorelli V, Cotter RJ, Cole PA. Nat Struct Mol Biol. 2004, 11(4):308-15.

p30II Michael B, Nair AM, Datta A, Hilaragi H, Ratner L, Lairmore MD. Virology 2006, 354:225-239.

p50(NFκB1) Furia B, Deng L, Wu K, Baylor S, Kehn K, Li H, Donnelly R, Coleman T, Kashanchi F. J Biol Chem 2002, 277:4973-4980.

p53 Gu W, Roeder RG. Cell 1997, 90:595-606; Liu L, Scolnick DM, Trievel RC, Zhang HB, Marmorstein R, Halazonetis TD, Berger SL. Mol Cell Biol 1999, 19:1202-1209.

p65 Buerki C, Rothgiesser KM, Valovka T, Owen HR, Rehrauer H, Fey M, Lane WS, Hottiger MO. Nucleic Acids Res 2008, 36:1665-1680; Saha RN, Jana M, Pahan K. J Immunol 2007, 179:7101-7109.

p73 Costanzo A, Merlo P, Pediconi N, Fulco M, Sartorelli V, Cole PA, Fontemaggi G, Fanciulli M, Schiltz L, Blandino G, *et al.* Mol Cell 2002, 9:175-186.

PARP-1 Hassa PO, Haenni SS, Buerki C, Meier NI, Lane WS, Owen H, Gersbach M, Imhof R, Hottiger MO. J Biol Chem 2005, 280:40450-40464.

PECAM1 Yang YY, Grammel M, Hang HC. *Bioorg Med Chem Lett*. 2011, 1;21(17):4976-9.

PLAG1 Zheng G, Yang YC. *J Biol Chem* 2005, 280:40773-40781.

PLAG2 Zheng G, Yang YC. *J Biol Chem* 2005, 280:40773-40781.

PML Hayakawa F, Abe A, Kitabayashi I, Pandolfi PP, Naoe T. *J Biol Chem* 2008.

PTBP1 Yang YY, Grammel M, Hang HC. *Bioorg Med Chem Lett*. 2011, 1;21(17):4976-9.

PU.1 Bai Y, Srinivasan L, Perkins L, Atchison ML. *J Immunol* 2005, 175:5160-5169.

Rb Markham D, Munro S, Soloway J, O'Connor DP, La Thangue NB. *EMBO Rep* 2006, 7:192-198.

REV3L Yang YY, Grammel M, Hang HC. *Bioorg Med Chem Lett*. 2011, 1;21(17):4976-9.

RUNX1 Yamaguchi Y, Kurokawa M, Imai Y, Izutsu K, Asai T, Ichikawa M, Yamamoto G, Nitta E, Yamagata T, Sasaki K, *et al*. *J Biol Chem* 2004, 279:15630-15638.

RUNX2 Jeon EJ, Lee KY, Choi NS, Lee MH, Kim HN, Jin YH, Ryoo HM, Choi JY, Yoshida M, Nishino N, *et al*. *J Biol Chem* 2006, 281:16502-16511.

RUNX3 Jin YH, Jeon EJ, Li QL, Lee YH, Choi JK, Kim WJ, Lee KY, Bae SC. *J Biol Chem* 2004, 279:29409-29417.



RXRa Zhao WX, Tian M, Zhao BX, Li GD, Liu B, Zhan YY, Chen HZ, Wu Q.  
Mol Endocrinol 2007, 21:2877-2889.

SET Yang YY, Grammel M, Hang HC. Bioorg Med Chem Lett. 2011, 1;21(17):4976-9.

SF-1 Chen WY, Juan LJ, Chung BC. Mol Cell Biol 2005, 25:10442-10453.

S-HDAg Mu JJ, Tsay YG, Juan LJ, Fu TF, Huang WH, Chen DS, Chen PJ.  
Virology 2004, 319:60-70.

Smad2 Tu AW, Luo K. J Biol Chem 2007, 282:21187-21196.

Smad7 Gronroos E, Hellman U, Heldin CH, Ericsson J. Mol Cell 2002, 10:483-493.

Sp3 Braun H, Koop R, Ertmer A, Nacht S, Suske G. Nucleic Acids Res 2001, 29:4994-5000.

STAT1 Kramer OH, Baus D, Knauer SK, Stein S, Jager E, Stauber RH, Grez M, Pfitzner E, Heinzl T. Genes Dev 2006, 20:473-485.

STAT3 Yuan ZL, Guan YJ, Chatterjee D, Chin YE. Science 2005, 307:269-273.

Tat Ott M, Schnolzer M, Garnica J, Fischle W, Emiliani S, Rackwitz HR, Verdin E. Curr Biol 1999, 9:1489-1492; Kiernan RE, Vanhulle C, Schiltz L, Adam E, Xiao H, Maudoux F, Calomme C, Burny A, Nakatani Y, Jeang KT, *et al.* Embo J 1999, 18:6106-6118.

TCF Waltzer L, Bienz M. Nature 1998, 395:521-525.

TFIIIE $\beta$  Imhof A, Yang XJ, Ogryzko VV, Nakatani Y, Wolffe AP, Ge H. *Curr Biol* 1997, 7:689-692.

TFIIF Imhof A, Yang XJ, Ogryzko VV, Nakatani Y, Wolffe AP, Ge H. *Curr Biol* 1997, 7:689-692.

Titin Yang YY, Grammel M, Hang HC. *Bioorg Med Chem Lett*. 2011, 1;21(17):4976-9.

Tubulin  $\beta$  Yang YY, Grammel M, Hang HC. *Bioorg Med Chem Lett*. 2011, 1;21(17):4976-9.

UBF Pelletier G, Stefanovsky VY, Faubladiere M, Hirschler-Laszkiwicz I, Savard J, Rothblum LI, Cote J, Moss T. *Mol Cell* 2000, 6:1059-1066.

WDR63 Yang YY, Grammel M, Hang HC. *Bioorg Med Chem Lett*. 2011, 1;21(17):4976-9.

WRN Muftuoglu M, Kusumoto R, Speina E, Beck G, Cheng WH, Bohr VA. *PLoS ONE* 2008, 3:e1918.

YY1 Yao YL, Yang WM, Seto E. *Mol Cell Biol* 2001, 21:5979-5991.

ZNF76 Zheng G, Yang YC. *Biochem Biophys Res Commun* 2006, 339:1069-1075.

**Supporting Table 2.** 411 protein binding partners of p300/CBP

53BP1 Jung SY, *et al.* Mol Endocrinol. 2005 Oct;19(10):2451-65.

A-Myb Facchinetti V, *et al.* Biochem J. 1997 Jun 15;324 ( Pt 3):729-36.

A238L Granja AG, *et al.* J. Immunol., February 15, 2008; 180(4): 2429-42.

Actin Jung SY, *et al.* Mol Endocrinol. 2005 Oct;19(10):2451-65.

AhR Tohkin M, *et al.* Mol Pharmacol. 2000 Oct;58(4):845-51.

AIRE Pitkanen J, *et al.* J Biol Chem. 2000 Jun 2;275(22):16802-9

Akt Chen J, *et al.* Cell Mol Life Sci. 2004 Jun;61(13):1675-83

AMF-1 Peng YC, *et al.* J Virol. 2000 Jul;74(13):5872-9

AML1 Blobel GA, *et al.* J Leukoc Biol. 2002 Apr;71(4):545-56.

AMPK Lin *et al.* Nature 2012. 482:251-255.

AP-2 Braganca J, *et al.* J Biol Chem. 2003 May 2;278(18):16021-9.

Ap1b1 Yin X, *et al.* Biochem Biophys Res Commun. 2005 Apr 15;329(3):1010-7.

APC5 Turnell AS, *et al.* Nature. 2005 Dec 1;438(7068):690-5.

APC7 Turnell AS, *et al.* Nature. 2005 Dec 1;438(7068):690-5.

APE1 Bhakat KK, *et al.* EMBO J. 2003 Dec 1;22(23):6299-309.

AR Ikonen T, *et al.* J Biol Chem. 1997 Nov 21;272(47):29821-8.

Arnt Kobayashi A, *et al.* J Biochem (Tokyo). 1997 Oct;122(4):703-10.

ATF-1 Goodman RH, *et al.* Genes Dev. 2000 Jul 1;14(13):1553-77.

ATF-2 Goodman RH, *et al.* Genes Dev. 2000 Jul 1;14(13):1553-77.

ATF-4 Goodman RH, *et al.* Genes Dev. 2000 Jul 1;14(13):1553-77.

ATF5 Liu DX *et al.* Mol. Cell. Biol. 2011;31 3906-3916

ATG7 Lee IH, *et al.* J Biol Chem. 2009 Mar 6;284(10):6322-8.

ATR Stauffer D, *et al.* J Biol Chem. 2007 Mar 30;282(13):9678-87.

atrophin-1 Nucifora FC, *et al.* Science. 2001 Mar 23;291(5512):2423-8.

b-catenin Takemaru KI, *et al.* J Cell Biol. 2000 Apr 17;149(2):249-54

B-Myb Bessa M, *et al.* Oncogene. 2001 Jun 7;20(26):3376-86.

B56gamma3 Chen J, *et al.* Mol Cell Biol. 2005 Jan;25(2):525-32.

BAF47 Cho H, *et al.* Mol Cell Biol. 1998 Sep;18(9):5355-63.

Bat3 Sasaki T, *et al.* Genes Dev. 2007 Apr 1;21(7):848-61.

BCL6 Bereshchenko OR, *et al.* Nat Genet. 2002 Dec;32(4):606-13

beta-TrCp1/Fbw1a Kimbrel EA, *et al.* J Biol Chem. 2009 May 8;284(19):13033-44.

bICP0 Zhang Y, *et al.* J. Gen. Virol., July 1, 2006; 87(Pt 7): 1843-51.

BRCA1 Goodman RH, *et al.* Genes Dev. 2000 Jul 1;14(13):1553-77.

BRG1 Naidu SR, *et al.* Oncogene. 2009 Jul 9;28(27):2492-501.

Bridge-1 Lee JH, *et al.* J Endocrinol. 2005 Nov;187(2):283-92.

BRLF1 Swenson JJ, *et al.* J Virol. 2001 Jul;75(13):6228-34.

Brn-2 Smit DJ, *et al.* Eur J Biochem. 2000 Nov;267(21):6413-22.

c-Fos Giordano A, *et al.* J Cell Physiol. 1999 Nov;181(2):218-30. Review.

c-Jun Giordano A, *et al.* J Cell Physiol. 1999 Nov;181(2):218-30. Review.

c-Maf Chen Q, *et al.* J Biol Chem. 2002 Jul 5;277(27):24081-9.

c-Myb Giordano A, *et al.* J Cell Physiol. 1999 Nov;181(2):218-30. Review.

c-Myc Vervoorts J, EMBO Rep. 2003 May;4(5):484-90.

C/EBPa Erickson RL, *et al.* J Biol Chem. 2001 May 11;276(19):16348-55.

C/EBPb Goodman RH, *et al.* Genes Dev. 2000 Jul 1;14(13):1553-77.

C/EBPd Kovacs KA, *et al.* J Biol Chem. 2003 Sep 19;278(38):36959-65.

C53 Yin X, *et al.* Int J Mol Med, August 1, 2005; 16(2): 251-6.

CARM1 Xu W, *et al.* Science. 2001 Dec 21;294(5551):2507-11.

Cart1 Iioka T, *et al.* J Bone Miner Res. 2003 Aug;18(8):1419-29.

CAS Ryan CM, *et al.* Cell Cycle. 2006 Sep;5(18):2146-52.

CD44 J. Cell Biol. published 8 June 2009

Cdc25B Ma ZQ, *et al.* Mol Cell Biol. 2001 Dec;21(23):8056-67.

CDK8 Cho H, *et al.* Mol Cell Biol. 1998 Sep;18(9):5355-63.

Cdk9Sunagawa Y *et al.* J Biol Chem. 2010 Mar 26;285(13):9556-68.

CDP Li S, *et al.* Proc Natl Acad Sci U S A. 2000 Jun 20;97(13):7166-71.

cdx-2 Hussain MA, *et al.* J Biol Chem. 1999 Oct 8;274(41):28950-7.

CFIm25 Shimazu T, *et al.* J Biol Chem. 2007 Feb 16;282(7):4470-8.

CHC Enari M, *et al.* Genes Dev. 2006 May 1;20(9):1087-99.

CIITA Goodman RH, *et al.* Genes Dev. 2000 Jul 1;14(13):1553-77.

CITED4 Braganca J, *et al.* J Biol Chem. 2002 Mar 8;277(10):8559-65.

CK2 Jung SY, *et al.* Mol Endocrinol. 2005 Oct;19(10):2451-65.

Cnot3 Yin X, *et al.* Biochem Biophys Res Commun. 2005 Apr 15;329(3):1010-7.

CoAA Iwasaki T, *et al.* J Biol Chem. 2001 Sep 7;276(36):33375-83.

CoCoA Kim JH, *et al.* Mol Cell. 2003 Dec;12(6):1537-49.

COUP-TF II Bailey P, *et al.* Nucleic Acids Res. 1998 Dec 1;26(23):5501-10.

CPAP Koyanagi M, *et al.* J Biol Chem. 2005 Apr 1;280(13):12430-7.

CREB Giordano A, *et al.* J Cell Physiol. 1999 Nov;181(2):218-30. Review.

CREM Laurance ME, *et al.* J Biol Chem. 1997 Jan 31;272(5):2646-51.

CREST Aizawa H, *et al.* Science. 2004 Jan 9;303(5655):197-202.

CRX Yanagi Y, *et al.* Biochem Biophys Res Commun. 2000 Mar 16;269(2):410-4.

CtBP1 Kim JH, *et al.* Nat Struct Mol Biol. 2005 May;12(5):423-8.

Ctbp2 Zhao LJ, *et al.* J Biol Chem. 2006 Feb 17;281(7):4183-9.

Cyclin D1 Fu M, *et al.* J Biol Chem. 2005 Aug 19;280(33):29728-42.

Cyclin E-Cdk2 Perkins ND, *et al.* Science. 1997 Jan 24;275(5299):523-7.

Dach1 Ikeda K, *et al.* Mol Cell Biol. 2002 Oct;22(19):6759-66.

DaxxEmelyanov AV, *et al.* J Biol Chem. 2002 Mar 29;277(13):11156-64.

DBP Lamprecht C, *et al.* J Biol Chem. 1999 Jun 18;274(25):17643-8.

DDX24 Jung SY, *et al.* Mol Endocrinol. 2005 Oct;19(10):2451-65.

dHAND Dai YS, *et al.* J Biol Chem. 2002 Jul 5;277(27):24390-8.

E1A Goodman RH, *et al.* Genes Dev. 2000 Jul 1;14(13):1553-77.

E2 Goodman RH, *et al.* Genes Dev. 2000 Jul 1;14(13):1553-77.

E2F-1 Goodman RH, *et al.* Genes Dev. 2000 Jul 1;14(13):1553-77.

E2F-5 Morris L, *et al.* Nat Cell Biol. 2000 Apr;2(4):232-9.

E47 Eckner R, *et al.* Genes Dev. 1996 Oct 1;10(19):2478-90.

E6 Goodman RH, *et al.* Genes Dev. 2000 Jul 1;14(13):1553-77.

EBF Zhao F, *et al.* Mol Cell Biol. 2003 Jun;23(11):3837-46.

EBNA2 Goodman RH, *et al.* Genes Dev. 2000 Jul 1;14(13):1553-77.

EBNA3C Cotter MA, *et al.* Mol Cell Biol. 2000 Aug;20(15):5722-35.

Egr-1 Silverman ES, *et al.* Biochem J. Nov 1998, 336:183-9.

EID-1 MacLellan WR, *et al.* Mol Cell Biol. 2000 Dec;20(23):8903-15.

EID-2 Ji A, Gene. 2003 Oct 30;318:35-43.

EID3Båvner A, *et al.* Nucleic Acids Res. 2005 Jun 24;33(11):3561-9.

Eif2b1 Yin X, *et al.* Biochem Biophys Res Commun. 2005 Apr 15;329(3):1010-7.

EKLF Blobel GA, *et al.* J Leukoc Biol. 2002 Apr;71(4):545-56. Review.

Elk-1 Janknecht R, *et al.* Biochem Biophys Res Commun. 1996 Nov 21;228(3):831-7.

Emb Molinari S, *et al.* Mol Cell Biol. 2004 Apr;24(7):2944-57.

ER81 Papoutsopoulou S, *et al.* Mol Cell Biol. 2000 Oct;20(19):7300-10.

ERa Chan HM, *et al.* J Cell Sci. 2001 Jul;114(Pt 13):2363-73. Review.

ERK2 Chen Y, *et al.* J. Biol. Chem. 2007; 282(37): p. 27215-2722.

ESE-1 Wang H, *et al.* J Biol Chem. 2004 Jun 11;279(24):25241-50.

Ets-1 Yang C, *et al.* Mol Cell Biol. 1998 Apr;18(4):2218-29.

Ets-2 Jayaraman G, *et al.* J Biol Chem. 1999 Jun 11;274(24):17342-52.

EVI1 Chakraborty S, *et al.* J Biol Chem. 2001 Nov 30;276(48):44936-43.



EWS Rossow KL, *et al.* Cancer Res. 2001 Mar 15;61(6):2690-5.

Eya1 Ikeda K, *et al.* Mol Cell Biol. 2002 Oct;22(19):6759-66.

Eya3 Ikeda K, *et al.* Mol Cell Biol. 2002 Oct;22(19):6759-66.

Fbx3 Shima Y, *et al.* Mol Cell Biol. 2008 Dec;28(23):7126-38.

Fen1 Hasan S, *et al.* Mol Cell. 2001 Jun;7(6):1221-31.

FGFR1 Fang X, *et al.* J Biol Chem. 2005 Aug 5;280(31):28451-62.

FHL2 Labalette C *et al.* Mol Cell Biol. 2004 Dec;24(24):10689-702.

FKLF2 Song CZ, *et al.* J Biol Chem. 2002 Mar 1;277(9):7029-36.

FOG-2 Hirai M, *et al.* J Biol Chem. 2004 Sep 3;279(36):37640-50.

FoxA2 Rausa FM, Mol Cell Biol. 2003 Jan;23(2):437-49.

Foxl1 Amelio AL, *et al.* Proc Natl Acad Sci U S A. 2007 Dec 18;104(51):20314-9.

FoxM1B Major ML, *et al.* Mol Cell Biol. 2004 Apr;24(7):2649-61.

FOXO1a Kwon HS, *et al.* Diabetes. 2004 Apr;53(4):899-910.

FOXO3a Mahmud DL, *et al.* Oncogene. 2002 Feb 28;21(10):1556-62.

FOXO4 Van Der Horst A, *et al.* J Biol Chem. 2004 Jul 9;279(28):28873-28879.

FXR Fang S, *et al.* J Biol Chem. 2008 Dec 12;283(50):35086-95.

GABPa Bannert N, *et al.* Proc Natl Acad Sci U S A. 1999 Feb 16;96(4):1541-6.

Gak Yin X, *et al.* Biochem Biophys Res Commun. 2005 Apr 15;329(3):1010-7.

GAPDH Sen *et al.* Nat Cell Biol. 2008 Jul;10(7):866-73.

GATA-1 Giordano A, *et al.* J Cell Physiol. 1999 Nov;181(2):218-30. Review.

GATA-2 Blobel GA, *et al.* J Leukoc Biol. 2002 Apr;71(4):545-56. Review.

GATA-3 Blobel GA, *et al.* J Leukoc Biol. 2002 Apr;71(4):545-56. Review.

GATA-4 Dai YS, *et al.* J Biol Chem. 2001 Oct 5;276(40):37178-85.

GATA-5 Kakita T, *et al.* J Biol Chem. 1999 Nov 26;274(48):34096-102.

GATA-6 Wada H, *et al.* J Biol Chem. 2000 Aug 18;275(33):25330-5.

GCMa Chang CW, *et al.* Mol Cell Biol. 2005 Oct;25(19):8401-14.

Gcn5Blobel GA, *et al.* J Leukoc Biol. 2002 Apr;71(4):545-56. Review.

Gli3 Dai P, *et al.* J Biol Chem. 1999 Mar 19;274(12):8143-52.

GMEB-1 Kaul S, *et al.* Mol Endocrinol. 2000 Jul;14(7):1010-27.

GMEB-2 Kaul S, *et al.* Mol Endocrinol. 2000 Jul;14(7):1010-27.

GR Chan HM, *et al.* J Cell Sci. 2001 Jul;114(Pt 13):2363-73. Review.

H2A McManus KJ, Biochem Cell Biol. 2001;79(3):253-66. Review.

H2B McManus KJ, Biochem Cell Biol. 2001;79(3):253-66. Review.

H3 An W *et al.* J Biol Chem. 2003 Jan 17;278(3):1504-10.

H4 An W *et al.* J Biol Chem. 2003 Jan 17;278(3):1504-10.

HBP1 Weibin W *et al.* Nucleic Acids Res. 2012; 40(3): p. 981-995

HBZ Clerc I, *et al.* J Biol Chem. 2008 Aug 29;283(35):23903-13.

HCV core protein Gómez-Gonzalo M *et al.* Virology. 2004 Oct 10;328(1):120-30.

HDAC1 Simone C, *et al.* Oncogene. 2004 Mar 18;23(12):2177-87.

HDAC6 Girdwood D, *et al.* Mol Cell. 2003 Apr;11(4):1043-54.

HEB Mandolesi G, *et al.* FEBS Lett. 2002 Jan 2;510(1-2):50-6.

Hes6 Eun B, *et al.* J Biol Chem. 2008 Feb 29;283(9):5939-49.

hHR23A Zhu Q, *et al.* Cancer Res. 2001 Jan 1;61(1):64-70.

Hic-5 Shibanuma M, *et al.* J Cell Biochem. 2004 Feb 15;91(3):633-45.

HIF-1a Giordano A, *et al.* J Cell Physiol. 1999 Nov;181(2):218-30. Review.

HIPK2 Hofmann TG, *et al.* Nat Cell Biol. 2002 Jan;4(1):1-10.

HLF Ema M, *et al.* EMBO J. 1999 Apr 1;18(7):1905-14.

HNF-6 Rausa FM, *et al.* Mol Cell Biol. 2003 Jan;23(2):437-49.

HNF1a Blobel GA, *et al.* J Leukoc Biol. 2002 Apr;71(4):545-56. Review.

HNF1beta Soutoglou E, *et al.* J Biol Chem. 2000 Apr 28;275(17):12515-20.

HNF4a Goodman RH, *et al.* Genes Dev. 2000 Jul 1;14(13):1553-77.

HOXA10 Shen WF, *et al.* Mol Cell Biol. 2001 Nov;21(21):7509-22.

HOXA11 Shen WF, *et al.* Mol Cell Biol. 2001 Nov;21(21):7509-22.

HOXA9 Shen WF, *et al.* Mol Cell Biol. 2001 Nov;21(21):7509-22.

HOXB1 Shen WF, *et al.* Mol Cell Biol. 2001 Nov;21(21):7509-22.

HOXB2 Shen WF, *et al.* Mol Cell Biol. 2001 Nov;21(21):7509-22.

HOXB3 Shen WF, *et al.* Mol Cell Biol. 2001 Nov;21(21):7509-22.

HOXB4 Shen WF, *et al.* Mol Cell Biol. 2001 Nov;21(21):7509-22.

HOXB6 Shen WF, *et al.* Mol Cell Biol. 2001 Nov;21(21):7509-22.

HOXB7 Shen WF, *et al.* Mol Cell Biol. 2001 Nov;21(21):7509-22.

HOXB9 Shen WF, *et al.* Mol Cell Biol. 2001 Nov;21(21):7509-22.

HOXD10 Shen WF, *et al.* Mol Cell Biol. 2001 Nov;21(21):7509-22.

HOXD12 Shen WF, *et al.* Mol Cell Biol. 2001 Nov;21(21):7509-22.

HOXD13 Shen WF, *et al.* Mol Cell Biol. 2001 Nov;21(21):7509-22.

HOXD4 Shen WF, *et al.* Mol Cell Biol. 2001 Nov;21(21):7509-22.

HPV E7 Bernat A, *et al.* Oncogene. 2003 Sep 11;22(39):7871-81.

HSF1 Hong S, *et al.* FEBS Lett. 2004 Feb 13;559(1-3):165-70.

htt Steffan JS, *et al.* Proc Natl Acad Sci U S A. 2000 Jun 6;97(12):6763-8.

IKK-alpha Yamamoto Y, *et al.* Nature. 2003 Jun 5;423(6940):655-9.

importin-a7 McManus KJ, *et al.* Biochem Cell Biol. 2001;79(3):253-66. Review.

ING2 Pedoux R, *et al.* Mol Cell Biol. 2005 Aug;25(15):6639-48.

IRF-1 Burysek L, *et al.* J Virol. 1999 Sep;73(9):7334-42.

IRF-2 Masumi A, *et al.* J Biol Chem. 2001 Jun 15;276(24):20973-80.

IRF-3 Weaver BK, *et al.* Mol Cell Biol. 1998 Mar;18(3):1359-68.

IRF-7 Yang H, *et al.* J Biol Chem. 2003 May 2;278(18):15495-504.

ITPK1 Chunfen Z *et al.* PNAS. 2012; 109(7): p. 2290-2295

JDP2 Pan J, *et al.* Nucleic Acids Res Suppl. 2003;(3):305-6.

JMY Goodman RH, *et al.* Genes Dev. 2000 Jul 1;14(13):1553-77.

JunB Goodman RH, *et al.* Genes Dev. 2000 Jul 1;14(13):1553-77.

K8/K-bZIP Hwang S, *et al.* J Virol. 2001 Oct;75(19):9509-16.

KLF2 SenBanerjee S, *et al.* J Exp Med. 2004 May 17;199(10):1305-15.

KLF4 Evans PM, *et al.* J Biol. Chem. 2007; 282(47): p. 33994-34002.

KLF5 Zhang Z, *et al.* Nucleic Acids Res. 2003 Apr 15;31(8):2196-208.

KLF6 Li D, *et al.* Cancer Research 65, 9216-9225, October 15, 2005.

Ku70 Barlev NA, *et al.* Mol Cell Biol. 1998 Mar;18(3):1349-58.

MafG      Blobel GA, *et al.* J Leukoc Biol. 2002 Apr;71(4):545-56. Review.

MAGE-11    Askew EB *et al.* J Biol Chem. 2010 Jul 9;285(28):21824-36

MAM        Fryer CJ, *et al.* Genes Dev. 2002 Jun 1;16(11):1397-411.

MAML2     Wu L, *et al.* EMBO J. 2005 Jul 6;24(13):2391-402.

mArnt3     Takahata S, *et al.* Genes Cells. 2000 Sep;5(9):739-47.

MASH1     Mandolesi G, *et al.* FEBS Lett. 2002 Jan 2;510(1-2):50-6.

MDC1       Jung SY, *et al.* Mol Endocrinol. 2005 Oct;19(10):2451-65.

MDM2       Goodman RH, *et al.* Genes Dev. 2000 Jul 1;14(13):1553-77.

MED25     Lee, *et al.* EMBO Journal (2007) 26, 15, 3545-3557.

MEF-2D     Slepak TI, *et al.* J Biol Chem. 2001 Mar 9;276(10):7575-85.

MEF2C     Sartorelli V, *et al.* Mol Cell Biol. 1997 Feb;17(2):1010-26.

MEKK1     See RH, *et al.* J Biol Chem. 2001 May 11;276(19):16310-7.

mGPBP     Hsu LC, *et al.* Mol Cell Biol. 2003 Dec;23(23):8773-85.

Mi          Goodman RH, *et al.* Genes Dev. 2000 Jul 1;14(13):1553-77.

Mi-2beta    Williams CJ, *et al.* Immunity. 2004 Jun;20(6):719-33.

MIER1      Blackmore TM, *et al.* BMC Res Notes, August 22, 2008; 1(1): 68.

Miz-1       Bowen H, *et al.* J Biol Chem. 2003 Sep 19;278(38):36017-26.

MKP-1 Cao W, *et al.* J Exp Med. 2008 Jun 9;205(6):1491-503.

MLL Ernst P, *et al.* Mol Cell Biol. 2001 Apr;21(7):2249-58.

MN1 Van Wely KH, *et al.* Oncogene. 2003 Feb 6;22(5):699-709.

MR Fuse H, *et al.* Mol Endocrinol. 2000 Jun;14(6):889-99.

Mre11 Jung SY, *et al.* Mol Endocrinol. 2005 Oct;19(10):2451-65.

MSG1 Yahata T, *et al.* J Biol Chem. 2000 Mar 24;275(12):8825-34.

Msh2 Jung SY, *et al.* Mol Endocrinol. 2005 Oct;19(10):2451-65.

Msh6 Jung SY, *et al.* Mol Endocrinol. 2005 Oct;19(10):2451-65.

MSK1 Janknecht R. Oncogene. 2003 Feb 6;22(5):746-55.

Msx1 Shetty S, *et al.* Biochem J. 1999 May 1;339 ( Pt 3):751-8.

Msx3 Mehra-Chaudhary R, *et al.* Biochem J. 2001 Jan 1;353(Pt 1):13-22.

MTF-1 Li Y, *et al.* Mol Cell Biol. 2008 Jul;28(13):4275-84.

MyoD Giordano A, *et al.* J Cell Physiol. 1999 Nov;181(2):218-30. Review.

mZac1b Huang SM, *et al.* Mol Cell Biol. 2000 Mar;20(5):1855-67.

N-Cadherin Marambaud P, *et al.* Cell. 2003 Sep 5;114(5):635-45.

N-CoR Cowger JJ, *et al.* Biochemistry, November 7, 2006; 45(44): 13150-62.

NAP-1 Asahara H, *et al.* Mol Cell Biol. 2002 May;22(9):2974-83.

NAP-2 Shikama N, *et al.* Mol Cell Biol. 2000 Dec;20(23):8933-43.

NBS1 Jung SY, *et al.* Mol Endocrinol. 2005 Oct;19(10):2451-65.

NEDD1 Jung SY, *et al.* Mol Endocrinol. 2005 Oct;19(10):2451-65.

NEMO Verma UN, *et al.* J Biol Chem. 2004 Jan 30;279(5):3509-15.

Neuro D Goodman RH, *et al.* Genes Dev. 2000 Jul 1;14(13):1553-77.

NF-E2 Goodman RH, *et al.* Genes Dev. 2000 Jul 1;14(13):1553-77.

NF-kB p50 Furia B, *et al.* J Biol Chem. 2002 Feb 15;277(7):4973-80.

NF-kB p65 Goodman RH, *et al.* Genes Dev. 2000 Jul 1;14(13):1553-77.

NF-YA Manni I, *et al.* Mol Biol Cell. 2008 Dec;19(12):5203-13.

NFAT1 Garcia-Rodriguez C, *et al.* J Exp Med. 1998 Jun 15;187(12):2031-6.

NFATc1 Kawamura *et al.* Circ Res. 2004 Jun 11;94(11):1492-9.

NFATc4 Yang T, *et al.* J Biol Chem. 2001 Oct 26;276(43):39569-76.

NFI Bachurski CJ, *et al.* Mol Cell Biol. 2003 Dec;23(24):9014-24.

NFY-B Faniello MC, *et al.* J Biol Chem. 1999 Mar 19;274(12):7623-6.

Ngn1 Sun Y, *et al.* Cell. 2001 Feb 9;104(3):365-76.

Nished Mathew S, *et al.* J Biol Chem. 2004 Sep 24;279(39).

Notch-1 Oswald F, *et al.* Mol Cell Biol. 2001 Nov;21(22):7761-74.



- Nrf2 Shen G, *et al.* J Biol Chem. 2004 May 28;279(22):23052-60.
- NS1 Ohshima T, *et al.* Int J Mol Med. 2001 Jan;7(1):49-54.
- Nup93 Ryan CM, *et al.* Cell Cycle. 2006 Sep;5(18):2146-52.
- Nup98 Kasper LH, *et al.* Mol Cell Biol. 1999 Jan;19(1):764-76.
- Nur77 Wansa KD, *et al.* J Biol Chem. 2002 Sep 6;277(36):33001-11.
- OGG1 Bhakat KK, *et al.* Mol Cell Biol. 2006 Mar;26(5):1654-65.
- OLIG2 Fukuda S, *et al.* Cell Death Differ. 2004 Feb;11(2):196-202.
- P-Lim Hashimoto K, *et al.* J Biol Chem. 2000 Oct 27;275(43):33365-72.
- P/CAF Goodman RH, *et al.* Genes Dev. 2000 Jul 1;14(13):1553-77.
- p/CIP Goodman RH, *et al.* Genes Dev. 2000 Jul 1;14(13):1553-77.
- p100 Välineva T, *et al.* J Biol Chem. 2005 Apr 15;280(15):14989-96.
- p220(NPAT) Wang A *et al.* Biochem Biophys Res Commun. 2004 Dec 24;325(4):1509-16.
- p28ING5 Shiseki M, *et al.* Cancer Res. 2003 May 15;63(10):2373-8.
- p29ING4 Shiseki M, *et al.* Cancer Res. 2003 May 15;63(10):2373-8.
- p30(II) Zhang W, *et al.* J Virol. 2001 Oct;75(20):9885-95.
- p33ING1b Toyama T, *et al.* Breast Cancer. 2004;11(1):33-7.
- p34SEI-1 Hirose T, *et al.* Int J Mol Med. 2003 Jun;11(6):705-12.

p35srj      Bhattacharya S, *et al.* Genes Dev. 1999 Jan 1;13(1):64-7.

p38 MAPK   Bratton MR, *et al.* Carcinogenesis. 2009 Jan;30(1):106-13.

p53    Giordano A, *et al.* J Cell Physiol. 1999 Nov;181(2):218-30. Review.

P532 Jung SY, *et al.* Mol Endocrinol. 2005 Oct;19(10):2451-65.

p63    Macpartlin M, *et al.* J Biol Chem. 2005 Aug 26;280(34):30604-10.

p68 RNA helicase   Rossow KL, *et al.* Oncogene. 2003 Jan 9;22(1):151-6.

p72 RNA helicase   Mooney Sm *et al.* J Biol Chem. 2010 Oct 1;285(40):30443-52.

p73    Goodman RH, *et al.* Genes Dev. 2000 Jul 1;14(13):1553-77.

p8    Hoffmeister A, *et al.* J Biol Chem. 2002 Jun 21;277(25):22314-9.

PAP Shimazu T, *et al.* J Biol Chem. 2007 Feb 16;282(7):4470-8.

PARP-1    Hassa PO, *et al.* J Biol Chem. 2005 Dec 9;280(49):40450-64.

pax-6      Hussain MA, *et al.* J Biol Chem. 1999 Oct 8;274(41):28950-7.

Pax3 Mayanil CS, *et al.* J. Biol. Chem. 2006; 281(34): p. 24544-24552.

Pax5 Emelyanov AV, *et al.* J Biol Chem. 2002 Mar 29;277(13):11156-64.

Pax8 De Leo R, *et al.* J Biol Chem. 2000 Nov 3;275(44):34100-5.

PC4 Kumar BR, *et al.* J Biol Chem. 2001 May 18;276(20):16804-9.

PCNA      Hasan S, *et al.* Nature. 2001 Mar 15;410(6826):387-91.

PDX-1 Qiu Y, *et al.* Mol Cell Biol. 2002 Jan;22(2):412-20.

PEA3 Liu Y, *et al.* J Biol Chem. 2004 Apr 30;279(18):18694-700.

PELP1 Vadlamudi RK, *et al.* J Biol Chem. 2001 Oct 12;276(41):38272-9.

PGC-1a Wallberg AE, *et al.* Mol Cell. 2003 Nov;12(5):1137-49.

PHOX2B Wu HT, *et al.* Hum Mutat. 2009 Apr;30(4):655-60.

PIAS1 Yin X, *et al.* J Interferon Cytokine Res. 2005 Jun;25(6):321-7.

PIAS3 Long J, *et al.* Proc Natl Acad Sci U S A. 2004 Jan 6;101(1):99-104.

PIMT Misra P, *et al.* J Biol Chem. 2002 May 31;277(22):20011-9.

Pit-1 Goodman RH, *et al.* Genes Dev. 2000 Jul 1;14(13):1553-77.

PLAG1 Zheng G, *et al.* J Biol Chem. 2005 Dec 9;280(49):40773-81.

PLAGL2 Zheng G, *et al.* J Biol Chem. 2005 Dec 9;280(49):40773-81.

PLZF Guidez F, *et al.* Mol Cell Biol. 2005 Jul;25(13):5552-66.

PML Doucas V, *et al.* Proc Natl Acad Sci U S A. 1999 Mar 16;96(6):2627-32.

Pol beta Hasan S, *et al.* Mol Cell. 2002 Nov;10(5):1213-22.

POLR2A Cho H, *et al.* Mol Cell Biol. 1998 Sep;18(9):5355-63.

Polyoma large T Goodman RH, *et al.* Genes Dev. 2000 Jul 1;14(13):1553-77.

pp90 RSK Goodman RH, *et al.* Genes Dev. 2000 Jul 1;14(13):1553-77.

PPARa Dowell P, *et al.* J Biol Chem. 1997 Dec 26;272(52):33435-43.

PPARg Mizukami J, *et al.* Biochem Biophys Res Commun. 1997 Nov 7;240(1):61-4.

PR Chan HM, *et al.* J Cell Sci. 2001 Jul;114(Pt 13):2363-73. Review.

PRIC320 Surapureddi S, *et al.* Biochem Biophys Res Commun. 2006 May 5;343(2):535-43.

PRMT5 Yang M, *et al.* PLoS Genet. 2009 Jun;5(6):e1000514.

ProTa Karetsov Z, *et al.* EMBO Rep. 2002 Apr;3(4):361-6.

Prox-1 Chen Q, *et al.* J Biol Chem. 2002 Jul 5;277(27):24081-9.

PRS1 Kaida A, *et al.* Biochem J. 2005 Oct 15;391(Pt 2):239-47.

PTEN Andrew G, *et al.* Mol Cell. 2006 Aug;23(4):575-87.

PTF1 Rodolosse A, *et al.* Biochem J. 2009 Mar 1;418(2):463-73.

PU.1 Blobel GA, *et al.* J Leukoc Biol. 2002 Apr;71(4):545-56. Review.

pVHL Roe JS, *et al.* Mol Cell. 2006 May 5;22(3):395-405.

Rad50 Jung SY, *et al.* Mol Endocrinol. 2005 Oct;19(10):2451-65.

RAR Chan HM, *et al.* J Cell Sci. 2001 Jul;114(Pt 13):2363-73. Review.

Rb Chan HM, *et al.* Nat Cell Biol. 2001 Jul;3(7):667-74.

RbAp48 Zhang Q, *et al.* Mol Cell Biol. 2000 Jul;20(14):4970-8.

RBCK1 Tatematsu, *et al.* J Biol Chem. 2005 Jun 17;280(24):22937-44.

Rch1 Bannister AJ, *et al.* Curr Biol. 2000 Apr 20;10(8):467-70.

RECQL4 Dietschy T, *et al.* J Cell Sci. 2009 Apr 15;122(Pt 8):1258-67.

RIP140 Vo N, *et al.* Mol Cell Biol. 2001 Sep;21(18):6181-8.

RNA helicase A Goodman RH, *et al.* Genes Dev. 2000 Jul 1;14(13):1553-77.

ROCK2 Tanaka T, *et al.* J. Biol. Chem. 2006; 281(22): p. 15320-15329.

RORalpha Lau P, *et al.* Nucleic Acids Res. 1999 Jan 15;27(2):411-20.

RSK2 Merienne K, *et al.* Mol Cell Biol. 2001 Oct;21(20):7089-96.

Runx2 Sierra J, *et al.* Mol Cell Biol. 2003 May;23(9):3339-51.

Runx3 Park SR, *et al.* Eur J Immunol. 2003 Dec;33(12):3386-92.

RXR Goodman RH, *et al.* Genes Dev. 2000 Jul 1;14(13):1553-77.

Sam68 Hong W, *et al.* Mol Cancer Res. 2002 Nov;1(1):48-55.

Sap-1a Giordano A, *et al.* J Cell Physiol. 1999 Nov;181(2):218-30. Review.

SATB1 Fujii Y, *et al.* Microbiol Immunol. 2003;47(10):803-11.

SF-1 Goodman RH, *et al.* Genes Dev. 2000 Jul 1;14(13):1553-77.

SGK1 Tai DJ, *et al.* J Biol Chem. 2009 Feb 13;284(7):4073-89.

Sh3gl1 Yin X, *et al.* Biochem Biophys Res Commun. 2005 Apr 15;329(3):1010-7.

SIRT1 Bouras T, *et al.* J Biol Chem. 2005 Mar 18;280(11):10264-76.

SIRT2 Black JC, *et al.* Mol Cell. 2008 Nov 7;32(3):449-55.

SKIP Leong GM, *et al.* Biochem Biophys Res Commun. 2004 Mar 19;315(4):1070-6.

Skn-1a Sugihara TM, Kudryavtseva EI. J Biol Chem. 2001 Aug 31;276(35):33036-44

Skp2 Kitagawa M, *et al.* Mol Cell. 2008 Feb 1;29(2):217-31.

Smad1 Nakashima K, *et al.* Science. 1999 Apr 16;284(5413):479-82.

Smad2 Topper JN, *et al.* Proc Natl Acad Sci U S A. 1998 Aug 4;95(16):9506-11.

Smad3 Giordano A, *et al.* J Cell Physiol. 1999 Nov;181(2):218-30. Review.

Smad4 Janknecht R, *et al.* Genes Dev. 1998 Jul 15;12(14):2114-9.

Smad7 Gronroos E, *et al.* Mol Cell. 2002 Sep;10(3):483-93.

SMIF Bai RY, *et al.* Nat Cell Biol. 2002 Mar;4(3):181-90.

SNIP1 Kim RH, *et al.* J Biol Chem. 2001 Dec 7;276(49):46297-304.

Sox-2 Nowling TK, *et al.* J Biol Chem. 2000 Feb 11;275(6):3810-8.

SOX4 Pan, X *et al.* Proc Natl Acad Sci U S A. 2009 Mar 10;106(10):3788-93.

Sox9 Tsuda M, *et al.* J Biol Chem. 2003 Jul 18;278(29):27224-9.

Sp1 Billon N, *et al.* Oncogene. 1999 May 6;18(18):2872-82.

Sp3 Kishikawa S, *et al.* Eur J Biochem. 2002 Jun;269(12):2961-70.

Spi-B Yamamoto H, *et al.* Cell Growth Differ. 2002 Feb;13(2):69-75.

SRC1 Goodman RH, *et al.* Genes Dev. 2000 Jul 1;14(13):1553-77.

SRCAP Monroy MA, *et al.* J Biol Chem. 2001 Nov 2;276(44):40721-6.

SREBP1a Goodman RH, *et al.* Genes Dev. 2000 Jul 1;14(13):1553-77.

SREBP2 Chan HM, *et al.* J Cell Sci. 2001 Jul;114(Pt 13):2363-73. Review.

SRF Ramirez S, *et al.* J Biol Chem. 1997 Dec 5;272(49):31016-21.

STAT1a Giordano A, *et al.* J Cell Physiol. 1999 Nov;181(2):218-30. Review.

STAT2 Giordano A, *et al.* J Cell Physiol. 1999 Nov;181(2):218-30. Review.

STAT3 Nakashima K, *et al.* Science. 1999 Apr 16;284(5413):479-82.

STAT4 O'Sullivan A, *et al.* J Biol Chem. 2004 Feb 20;279(8):7339-45.

STAT5a Pfitzner E, *et al.* Mol Endocrinol. 1998 Oct;12(10):1582-93.

STAT5b Pfitzner E, *et al.* Mol Endocrinol. 1998 Oct;12(10):1582-93.

STAT6 Gingras S, *et al.* Nucleic Acids Res. 1999 Jul 1;27(13):2722-9.

Strap Demonacos C, *et al.* Mol Cell. 2001 Jul;8(1):71-84.

Sug1 Koues OI, *et al.* Mol Cell Biol. 2008 Oct;28(19):5837-50.

survivin Wang *et al.* J Biol Chem. 2010 Nov 12;285(46):36129-37.

SV40 large T Goodman RH, *et al.* Genes Dev. 2000 Jul 1;14(13):1553-77.

SYT Chan HM, *et al.* J Cell Sci. 2001 Jul;114(Pt 13):2363-73. Review.

T-bet Chen GY, *et al.* Proc Natl Acad Sci U S A. 2006 Nov 7;103(45):16894-9.

TAF1 Shikama N, *et al.* Mol Cell Biol. 2000 Dec;20(23):8933-43.

TAFII68 Wang X, *et al.* Nature. 2008 Jul 3;454(7200):126-30.

TAL1 Goodman RH, *et al.* Genes Dev. 2000 Jul 1;14(13):1553-77.

Tat Goodman RH, *et al.* Genes Dev. 2000 Jul 1;14(13):1553-77.

Tax Goodman RH, *et al.* Genes Dev. 2000 Jul 1;14(13):1553-77.

TAZ Murakami M, *et al.* Proc Natl Acad Sci U S A. 2005 Dec 13;102(50):18034-9.

TBP Goodman RH, *et al.* Genes Dev. 2000 Jul 1;14(13):1553-77.

TCF-4N Kennell JA, *et al.* Mol Cell Biol. 2003 Aug;23(15):5366-75.

TCL1 Pekarsky Y, *et al.* Proc Natl Acad Sci U S A. 2008 Dec 16;105(50):19643-8.

TDG Tini M, *et al.* Mol Cell. 2002 Feb;9(2):265-77.

TFIIB Goodman RH, *et al.* Genes Dev. 2000 Jul 1;14(13):1553-77.

TFIIEb McManus KJ, *et al.* Biochem Cell Biol. 2001;79(3):253-66. Review.

TFIIF McManus KJ, *et al.* Biochem Cell Biol. 2001;79(3):253-66. Review.



TFIIIC Mertens C, *et al.* Mol Cell Biol. 2008 Sep;28(18):5764-76.

ThPOK Zhang *et al.* J Immunol. 2010 Oct 1;185(7):3960-9.

TIF2 Voegel JJ, *et al.* EMBO J. 1998 Jan 15;17(2):507-19.

TIP-1 Badri KR, *et al.* Mol Cell Biol. 2008 Oct;28(20):6358-72.

TIP-2 Badri KR, *et al.* Mol Cell Biol. 2008 Oct;28(20):6358-72.

TIP-3 Badri KR, *et al.* Mol Cell Biol. 2008 Oct;28(20):6358-72.

TIP-4 Badri KR, *et al.* Mol Cell Biol. 2008 Oct;28(20):6358-72.

TIP-5 Badri KR, *et al.* Mol Cell Biol. 2008 Oct;28(20):6358-72.

TIP-6 Badri KR, *et al.* Mol Cell Biol. 2008 Oct;28(20):6358-72.

TIP-7 Badri KR, *et al.* Mol Cell Biol. 2008 Oct;28(20):6358-72.

TIP-8 Badri KR, *et al.* Mol Cell Biol. 2008 Oct;28(20):6358-72.

TLS Wang X, *et al.* Nature. 2008 Jul 3;454(7200):126-30.

TLX1 Riz I, *et al.* Oncogene. 2007 Jun 14;26(28):4115-23.

TORC2 Ravnskjaer K, *et al.* EMBO J. 2007 Jun 20;26(12):2880-9.

TP2 Pradeepa MM, *et al.* J Biol Chem. 2009 Oct 23;284(43):29956-67.

TR beta Chan HM, *et al.* J Cell Sci. 2001 Jul;114(Pt 13):2363-73. Review.

TRBP Ko L, *et al.* Proc Natl Acad Sci U S A. 2000 May 23;97(11):6212-7.

TReP-132 Gizard F, *et al.* J Biol Chem. 2001 Sep 7;276(36):33881-92.

Trip10 Yin X, *et al.* Biochem Biophys Res Commun. 2005 Apr 15;329(3):1010-7.

TSG101 Sun Z, *et al.* Cancer. 1999 Aug 15;86(4):689-96.

TTF-1 Yi M, *et al.* J Biol Chem. 2002 Jan 25;277(4):2997-3005.

Twist Goodman RH, *et al.* Genes Dev. 2000 Jul 1;14(13):1553-77.

UBF Pelletier G, *et al.* Mol Cell. 2000 Nov;6(5):1059-66.

VDR Castillo AI, *et al.* Mol Endocrinol. 1999 Jul;13(7):1141-54.

vIRF-1 Burysek L, *et al.* J Virol. 1999 Sep;73(9):7334-42.

VP16 Ikeda K, *et al.* Genes Cells. 2002 Jan;7(1):49-58.

Vpr Felzien LK, *et al.* Proc Natl Acad Sci U S A. 1998 Apr 28;95(9):5281-6.

VRK1 Valbuena A, *et al.* Plos One 2008 Jul 9;3(7):e2649.

VRK2 Valbuena A, *et al.* Plos One 2008 Jul 9;3(7):e2649.

WRN Blander G, *et al.* J. Biol Chem. 2002 Dec 27;277(52):50934-40.

WT1 Wang W, *et al.* J Biol Chem. 2001 May 18;276(20):16810-6.

XAF1 Sun Y, *et al.* Digestion. 2008;77(2):79-86.

YAP Strano S, *et al.* Mol Cell. 2005 May 13;18(4):447-59.

YB-1 Higashi K, *et al.* J. Biol. Chem., Vol. 278, Issue 44, 43470-43479.

- YY1 Goodman RH, *et al.* Genes Dev. 2000 Jul 1;14(13):1553-77.
- ZBP-89 Bai L, *et al.* J Biol Chem. 2000 Sep 29;275(39):30725-33.
- ZBTB2 Jung SY, *et al.* Mol Endocrinol. 2005 Oct;19(10):2451-65.
- ZEB-1 Postigo AA, *et al.* EMBO J. 2003 May 15;22(10):2453-62.
- Zfp521 Kamiya *et al.* Nature. 2011 Feb 24;470(7335):503-9.
- ZNF639 Jung SY, *et al.* Mol Endocrinol. 2005 Oct;19(10):2451-65.
